# Supplementary material for: Inducing Biomechanical Heterogeneity in Brain Tumor Modeling by MR Elastography: Effects on Tumor Growth, Vascular Density and Delivery of Therapeutics
Source: MDPI journal article supplement (doi:10.3390/cancers14040884), 2022-02-10
Supplement: s1 [file s1]

# Supplementary Material: Inducing Biomechanical Heterogeneity in Brain Tumor Modeling by MR Elastography: Effects on Tumor Growth, Vascular Density and Delivery of Therapeutics

Constantinos Harkos, Siri Fløgstad Svensson, Kyrre E. Emblem and Triantafyllos Stylianopoulos \*

**Table S1.** Values of model parameters.

| Parameter         | Description                                                    | Value                                                                       | Reference |
|-------------------|----------------------------------------------------------------|-----------------------------------------------------------------------------|-----------|
| $k_{th}$          | hydraulic conductivity of tumor                                | $3.8 \times 10^{-12} \text{ m}^2 \cdot \text{Pa}^{-1} \cdot \text{s}^{-1}$  | [1]       |
| $c_{iox}$         | oxygen concentration in the vessels                            | $0.2 \text{ mol} \cdot \text{m}^{-3}$                                       | [2,3]     |
| $D_{ox}$          | oxygen diffusion coefficient                                   | $1.55 \times 10^{-4} \text{ m}^2 \cdot \text{day}^{-1}$                     | [2]       |
| $A_{ox}$          | oxygen uptake parameter                                        | $2200 \text{ mol} \cdot \text{m}^{-3} \cdot \text{day}^{-1}$                | [2,4]     |
| $k_{ox}$          | oxygen uptake parameter                                        | $0.00464 \text{ mol} \cdot \text{m}^{-3}$                                   | [2,4]     |
| $k_1$             | growth rate parameter                                          | $0.032 \text{ day}^{-1}$                                                    | [5]       |
| $k_2$             | growth rate parameter                                          | $0.0083 \text{ mol} \cdot \text{m}^{-3}$                                    | [4]       |
| $\nu_{Tumor}$     | Poisson's ratio (tumor)                                        | 0.25                                                                        | [6]       |
| $\nu_{Normal}$    | Poisson's ratio (host)                                         | 0.2                                                                         | [6]       |
| $\omega$          | radial frequency                                               | $100\pi \text{ rad} \cdot \text{s}^{-1}$                                    | --        |
| $Q_{cell}$        | constant proliferation rate                                    | $0.012 \text{ day}^{-1}$                                                    | [7]       |
| $p_{v\_tumor}$    | vascular pressure in tumor                                     | 1 kPa                                                                       | [8]       |
| $p_{v\_Normal}$   | vascular pressure in host tissue                               | 2 kPa                                                                       | [8]       |
| $p_{vl}$          | lymphatic pressure                                             | 0                                                                           | [6]       |
| $S_{v0}$          | vascular density of host tissue                                | $70 \text{ cm}^{-1}$                                                        | [8]       |
| $L_{pl} S_{vl}$   | permeability of lymphatics                                     | $0.05 \text{ (mmHg} \cdot \text{s)}^{-1}$                                   | [8]       |
| $c_e$             | receptor concentration                                         | $0.01 \text{ mol} \cdot \text{m}^{-3}$                                      | [9,10]    |
| $\Phi$            | volume fraction of tumor accessible to drug                    | 0.3                                                                         | [9,10]    |
| $k_{on}$          | binding rate constant                                          | $1.296 \times 10^6 \text{ m}^3 \cdot \text{mol}^{-1} \cdot \text{day}^{-1}$ | [11,12]   |
| $k_{off}$         | dissociation rate constant                                     | $691.2 \text{ day}^{-1}$                                                    | [11,12]   |
| $k_{int}$         | internalization rate constant                                  | $3.7 \text{ day}^{-1}$                                                      | [11,12]   |
| $t_0$             | time of drug injection                                         | 41 day                                                                      | --        |
| $D_{f\_rs=1nm}$   | drug diffusion coefficient (1nm)                               | $1 \times 10^{-6} \text{ cm}^2 \cdot \text{s}^{-1}$                         | [13]      |
| $D_{f\_rs=35nm}$  | drug diffusion coefficient (35nm)                              | $0.5 \times 10^{-8} \text{ cm}^2 \cdot \text{s}^{-1}$                       | [13]      |
| $D_{f\_rs=75nm}$  | drug diffusion coefficient (75nm)                              | $0.5 \times 10^{-9} \text{ cm}^2 \cdot \text{s}^{-1}$                       | [13]      |
| $k_d$             | blood circulation decay                                        | $0.417 \text{ day}^{-1}$                                                    | [14]      |
| $L_{vw}$          | vessel wall thickness                                          | $5 \times 10^{-6} \text{ m}$                                                | [6]       |
| $\eta$            | plasma viscosity at 310K                                       | $1.3 \times 10^{-3} \text{ Pa} \cdot \text{s}$                              | [15]      |
| $\gamma_{tumor}$  | fraction of vessel wall surface area occupied by pores (tumor) | $1 \times 10^{-3}$                                                          | [14]      |
| $\gamma_{Normal}$ | fraction of vessel wall surface area occupied by pores (host)  | $1 \times 10^{-4}$                                                          | [14]      |
| $r_{0\_host}$     | vessel wall pore radius (host)                                 | 3.5 nm                                                                      | [16]      |
| $r_{0\_tumor}$    | vessel wall pore radius (tumor)                                | 50–150 nm                                                                   | [16]      |

**Table S2.** Scan parameters for patients and healthy subject.

| Sequence                 | Repetition time (ms) | Echo time (ms) | Acquisition matrix | Resolution (mm <sup>3</sup> ) | Additional information                                                                                                                                      |
|--------------------------|----------------------|----------------|--------------------|-------------------------------|-------------------------------------------------------------------------------------------------------------------------------------------------------------|
| T <sub>2</sub> -weighted | 3000                 | 80             | 420 × 270 × 28     | 0.6 × 0.6 × 4                 | Turbo-spin echo sequence                                                                                                                                    |
| FLAIR                    | 4800                 | 320            | 252 × 249 × 183    | 1 × 1 × 1                     | Turbo-spin echo sequence, inversion time = 1650 ms                                                                                                          |
| T <sub>1</sub> -weighted | 5.2                  | 2.3            | 256 × 256 × 368    | 1 × 1 × 1                     | 3D inversion recovery turbo field echo, flip angle = 8°, shot interval = 3000 ms, inversion delay = 853 ms                                                  |
| Diffusion Tensor Imaging | 9800                 | 60             | 94 × 94 × 50       | 2.5 × 2.5 × 2.5               | Spin echo, single-shot, echo-planar imaging readout, sensitivity encoding 2, 15 gradient directions, b-values 0 s/mm <sup>2</sup> and 800 s/mm <sup>2</sup> |
| MR Elastography          | 295                  | 12             | 72 × 70 × 15       | 3.1 × 3.1 × 3.1               | Motion-encoding gradient strength 13.2 mT/m, sensitivity encoding 2                                                                                         |

**Table S3.** Mean values and standard deviation vascular density and drug concentration inside the tumor domain of the 5 patients at day 43 of the simulation.

|                         |                    | Patient 1 | Patient 2 | Patient 3 | Patient 4 | Patient 5 |
|-------------------------|--------------------|-----------|-----------|-----------|-----------|-----------|
| Vascular Density (1/cm) | Mean               | 46.933    | 40.110    | 29.515    | 32.882    | 38.723    |
|                         | Standard Deviation | 18.267    | 16.336    | 11.619    | 12.976    | 18.025    |
| Drug Concentration      | Mean               | 18.471    | 16.159    | 13.352    | 14.291    | 16.265    |
|                         | Standard Deviation | 4.436     | 4.080     | 4.361     | 3.229     | 4.932     |

**Table S4.** Fraction of the tumor that receives drug concentration greater than 20 for the 6 cases of Figure 7.

|                                           | Vessel Wall Pore Size in Tumor (nm) | 100 | 200   | 300   |
|-------------------------------------------|-------------------------------------|-----|-------|-------|
| Volume Fraction (Drug Concentration > 20) | Constant Elasticity                 | 0   | 0.464 | 0.560 |
|                                           | MRE                                 | 0   | 0.373 | 0.666 |

**Table S5.** Fraction of the tumor that receives drug concentration greater than 20 for the 6 cases of Figure 8.

|                                           | Drug Size (nm)      | 2     | 70    | 150 |
|-------------------------------------------|---------------------|-------|-------|-----|
| Volume Fraction (Drug Concentration > 20) | Constant Elasticity | 0.464 | 0.001 | 0   |
|                                           | MRE                 | 0.373 | 0.002 | 0   |

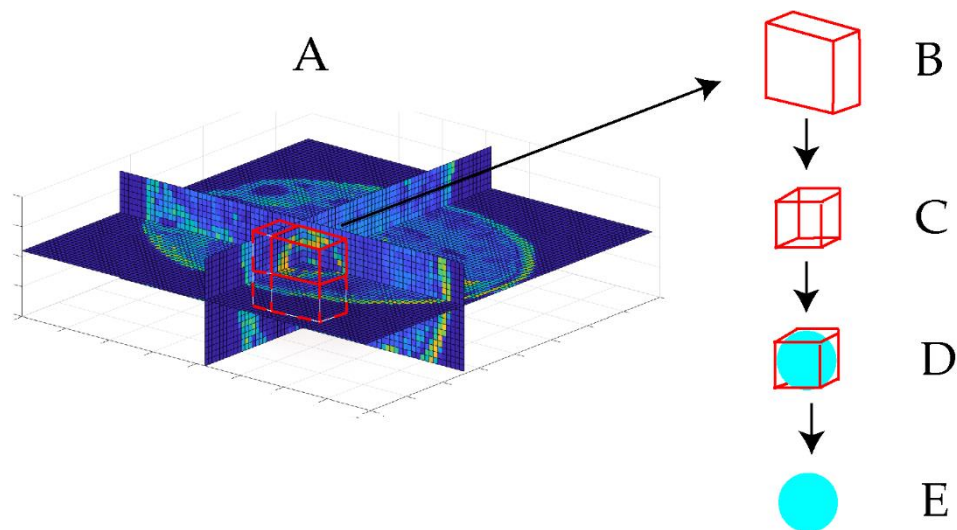

**Figure S1.** Deformation and interpolation of the patient’s data to the initial tumor seed: (A) T1c MRE space used to locate the tumor region of each patient; (B) tumor data of each patient; (C) deforming the data into becoming a cube; (D) interpolating the data of the cube to each initial tumor seed; (E) initial tumor seed with data.

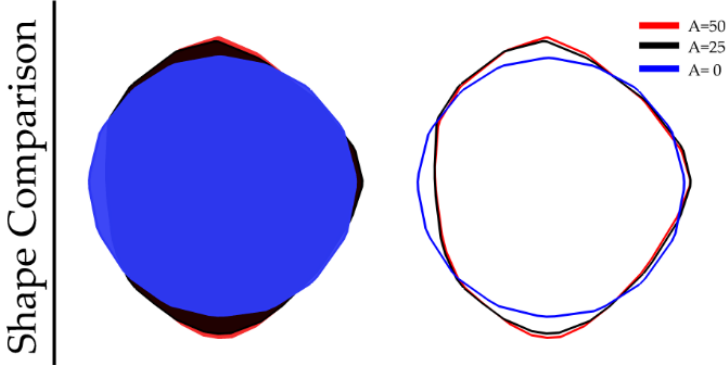

**Figure S2.** Overlap of the tumor shapes displayed in figure 3 for the isotropic ( $A = 0$ ) case and anisotropic ( $A = 25$  and  $A = 50$ ) cases.

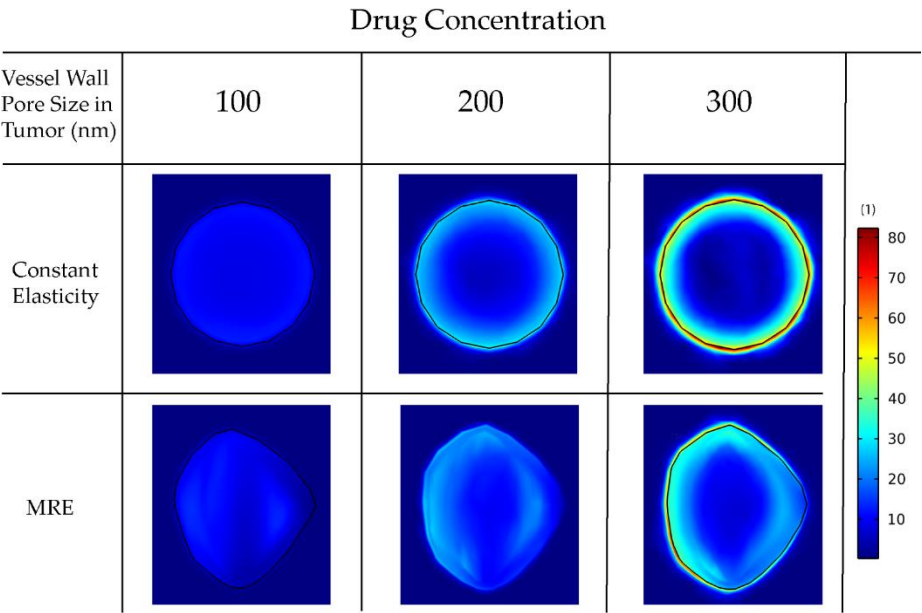

**Figure S3.** Second version of Figure 7 where the same colorbar was used for all figures.

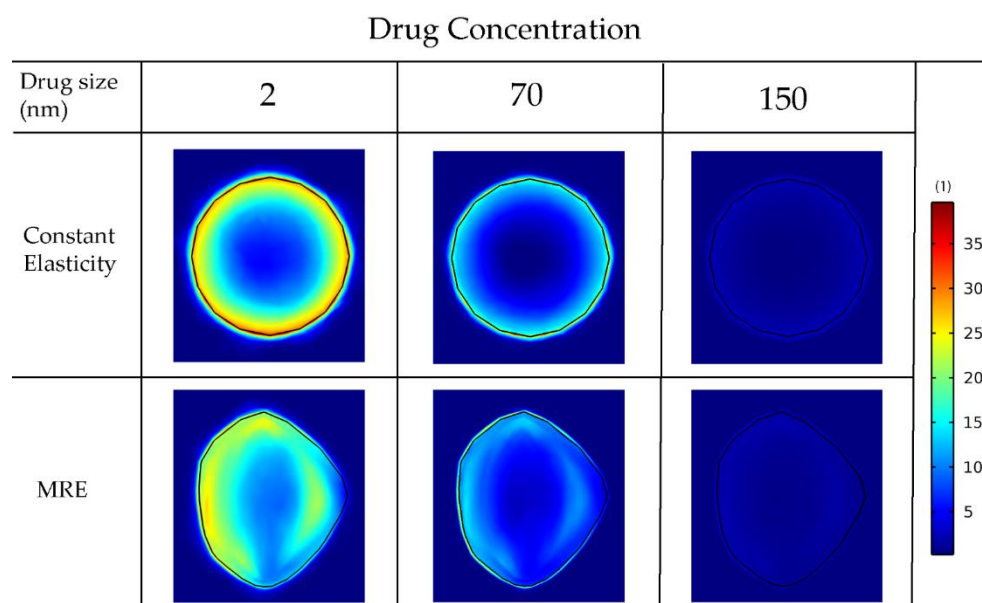

**Figure S4.** Second version of Figure 8 where the same colorbar was used for all figures.

## References

1. Netti, P.A.; Berk, D.A.; Swartz, M.A.; Grodzinsky, A.J.; Jain, R.K. Role of Extracellular Matrix Assembly in Interstitial Transport in Solid Tumors. *Cancer Res.* **2000**, *60*, 2497–2503.
2. Kim, Y.; Stolarska, M.A.; Othmer, H.G. The Role of the Microenvironment in Tumor Growth and Invasion. *Prog. Biophys. Mol. Biol.* **2011**, *106*, 353–379, doi:10.1016/j.pbiomolbio.2011.06.006.
3. Hermann, P.C.; Huber, S.L.; Herrler, T.; Aicher, A.; Ellwart, J.W.; Guba, M.; Bruns, C.J.; Heeschen, C. Distinct Populations of Cancer Stem Cells Determine Tumor Growth and Metastatic Activity in Human Pancreatic Cancer. *Cell Stem Cell* **2007**, *1*, 313–323, doi:10.1016/j.stem.2007.06.002.
4. Casciari, J.J.; Sotirchos, S. V.; Sutherland, R.M. Variations in Tumor Cell Growth Rates and Metabolism with Oxygen Concentration, Glucose Concentration, and Extracellular PH. *J. Cell. Physiol.* **1992**, *151*, 386–394, doi:10.1002/jcp.1041510220.
5. Angeli, S.; Emblem, K.E.; Due-Tonnessen, P.; Stylianopoulos, T. Towards Patient-Specific Modeling of Brain Tumor Growth and Formation of Secondary Nodes Guided by DTI-MRI. *NeuroImage Clin.* **2018**, *20*, 664–673, doi:10.1016/j.nicl.2018.08.032.
6. Stylianopoulos, T.; Martin, J.D.; Snuderl, M.; Mpekris, F.; Jain, S.R.; Jain, R.K. Coevolution of Solid Stress and Interstitial Fluid Pressure in Tumors during Progression: Implications for Vascular Collapse. *Cancer Res.* **2013**, *73*, 3833–3841, doi:10.1158/0008-5472.CAN-12-4521.
7. Swanson, K.R.; Rostomily, R.C.; Alvord, E.C. A Mathematical Modelling Tool for Predicting Survival of Individual Patients Following Resection of Glioblastoma: A Proof of Principle. *Br. J. Cancer* **2008**, *98*, 113–119, doi:10.1038/sj.bjc.6604125.
8. Baxter, L.T.; Jain, R.K. Transport of Fluid and Macromolecules in Tumors. I. Role of Interstitial Pressure and Convection. *Microvasc. Res.* **1989**, *37*, 77–104, doi:10.1016/0026-2862(89)90074-5.
9. Schmidt, M.M.; Wittrup, K.D. A Modeling Analysis of the Effects of Molecular Size and Binding Affinity on Tumor Targeting. *Mol. Cancer Ther.* **2009**, *8*, 2861–2871, doi:10.1158/1535-7163.MCT-09-0195.
10. Mok, W.; Stylianopoulos, T.; Boucher, Y.; Jain, R.K. Mathematical Modeling of Herpes Simplex Virus Distribution in Solid Tumors: Implications for Cancer Gene Therapy. *Clin. Cancer Res.* **2009**, *15*, 2352–2360, doi:10.1158/1078-0432.CCR-08-2082.
11. Stylianopoulos, T.; Economides, E.-A.; Baish, J.W.; Fukumura, D.; Jain, R.K. Towards Optimal Design of Cancer Nanomedicines: Multi-Stage Nanoparticles for the Treatment of Solid Tumors. *Ann. Biomed. Eng.* **2015**, *43*, 2291–2300, doi:10.1007/s10439-015-1276-9.
12. Mpekris, F.; Angeli, S.; Pirentis, A.P.; Stylianopoulos, T. Stress-Mediated Progression of Solid Tumors: Effect of Mechanical Stress on Tissue Oxygenation, Cancer Cell Proliferation, and Drug Delivery. *Biomech. Model. Mechanobiol.* **2015**, *14*, 1391–1402, doi:10.1007/s10237-015-0682-0.
13. Pluen, A.; Boucher, Y.; Ramanujan, S.; McKee, T.D.; Gohongi, T.; Di Tomaso, E.; Brown, E.B.; Izumi, Y.; Campbell, R.B.; Berk, D.A.; et al. Role of Tumor-Host Interactions in Interstitial Diffusion of Macromolecules: Cranial vs. Subcutaneous Tumors. *Proc. Natl. Acad. Sci. U. S. A.* **2001**, *98*, 4628–4633, doi:10.1073/pnas.081626898.
14. Chauhan, V.P.; Stylianopoulos, T.; Martin, J.D.; PopoviÄ, Z.; Chen, O.; Kamoun, W.S.; Bawendi, M.G.; Fukumura, D.; Jain, R.K. Normalization of Tumour Blood Vessels Improves the Delivery of Nanomedicines in a Size-Dependent Manner. *Nat. Nanotechnol.* **2012**, *7*, 383–388, doi:10.1038/nnano.2012.45.
15. K  sm  rky, G.; Kenyeres, P.; R  bai, M.; T  th, K. Plasma Viscosity: A Forgotten Variable. *Clin. Hemorheol. Microcirc.* **2008**, *39*, 243–246, doi:10.3233/CH-2008-1088.

16. Hobbs, S.K.; Monsky, W.L.; Yuan, F.; Roberts, W.G.; Griffith, L.; Torchilin, V.P.; Jain, R.K. Regulation of Transport Pathways in Tumor Vessels: Role of Tumor Type and Microenvironment. *Proc. Natl. Acad. Sci. U. S. A.* **1998**, *95*, 4607–4612, doi:10.1073/pnas.95.8.4607.
